# Supplementary material for: Elucidating sleep disorders: a comprehensive bioinformatics analysis of functional gene sets and hub genes
Source: Front Immunol. 2024 Jun 11;15:1381765. doi: 10.3389/fimmu.2024.1381765 (PMC11196417; doi:10.3389/fimmu.2024.1381765)
Supplement: Supplementary file 6 [file Table_2.xlsx]

## Sheet: inflammatory pathway
	ID	Description	setSize	enrichmentScore	NES	pvalue	p.adjust	qvalue	rank	leading_edge	core_enrichment
PID_IL12_STAT4_PATHWAY	PID_IL12_STAT4_PATHWAY	PID_IL12_STAT4_PATHWAY	15	0.596858	2.54229	2.24516e-05	0.000509702	0.000383409	1184	tags=87%, list=29%, signal=61%	3122/2353/3606/3659/915/5551/3725/916/5534/917/942/8807/920
PID_IL12_2PATHWAY	PID_IL12_2PATHWAY	PID_IL12_2PATHWAY	22	0.518472	2.57712	4.84603e-05	0.000962424	0.000723957	1208	tags=77%, list=30%, signal=54%	3122/2353/3606/915/3560/7879/925/8767/916/5534/917/4616/8807/8320/920/3553/6778
PID_IL8_CXCR2_PATHWAY	PID_IL8_CXCR2_PATHWAY	PID_IL8_CXCR2_PATHWAY	20	0.512299	2.43968	6.01376e-05	0.00112497	0.000846231	592	tags=60%, list=15%, signal=51%	5880/2782/2268/1794/2771/4067/7879/5515/2769/8766/5518/3055
RUTELLA_RESPONSE_TO_CSF2RB_AND_IL4_DN	RUTELLA_RESPONSE_TO_CSF2RB_AND_IL4_DN	RUTELLA_RESPONSE_TO_CSF2RB_AND_IL4_DN	115	0.379379	3.45311	1e-10	8.45181e-09	6.35764e-09	1650	tags=74%, list=41%, signal=45%	3133/8031/2219/6280/7538/4818/3903/8635/1462/10581/3606/2971/2799/7763/5997/1675/3385/3916/6146/3074/9404/51316/23593/2357/23228/9935/54541/5175/10901/1536/1958/728/4502/6653/4170/6283/9262/3431/9709/6648/4005/23433/7277/4615/5732/57018/10982/2534/114548/5610/123/1509/51063/29887/56994/54741/4494/10695/1839/10288/79706/55893/5199/3553/11213/1848/1362/9489/6480/57162/3030/80273/10188/26234/6651/12…
RUTELLA_RESPONSE_TO_HGF_VS_CSF2RB_AND_IL4_UP	RUTELLA_RESPONSE_TO_HGF_VS_CSF2RB_AND_IL4_UP	RUTELLA_RESPONSE_TO_HGF_VS_CSF2RB_AND_IL4_UP	122	0.336686	3.10369	2.55553e-09	1.55887e-07	1.17262e-07	1630	tags=69%, list=41%, signal=42%	3133/8031/2219/6280/4818/3903/8635/10581/3606/2971/2799/7009/1675/3916/3074/9404/4190/2357/23228/9935/54541/5175/10901/1536/1958/2040/3586/728/4502/6283/3431/5693/6648/4005/4864/7037/23433/7277/4615/3920/5732/10982/2534/114548/5610/123/1509/51063/29887/56994/54741/4494/51109/10695/8942/1839/10288/1798/79706/55893/3553/11213/1545/1848/1362/9489/54502/6480/3030/80273/10188/26234/8624/1230/6482/1013…
WP_IL_24_SIGNALING_PATHWAY	WP_IL_24_SIGNALING_PATHWAY	WP_IL_24_SIGNALING_PATHWAY	75	0.332349	2.65231	1.51736e-05	0.000364531	0.000274209	1000	tags=52%, list=25%, signal=40%	6194/4792/6277/960/3659/7184/7295/5551/7852/7494/23645/4214/3320/5175/1984/4953/5293/7132/83939/3123/142/9308/4170/1508/3725/1027/2932/3315/948/6648/3611/3309/3716/9261/942/8837/5728/5610/5595
WP_IL_3_SIGNALING_PATHWAY	WP_IL_3_SIGNALING_PATHWAY	WP_IL_3_SIGNALING_PATHWAY	20	0.533245	2.53943	2.38968e-05	0.000537294	0.000404165	1000	tags=75%, list=25%, signal=57%	2353/7529/4067/969/5293/3055/3635/1399/3725/6850/3716/942/2534/2885/5595

## Sheet: immunity
	ID	Description	setSize	enrichmentScore	NES	pvalue	p.adjust	qvalue	rank	leading_edge	core_enrichment
GALINDO_IMMUNE_RESPONSE_TO_ENTEROTOXIN	GALINDO_IMMUNE_RESPONSE_TO_ENTEROTOXIN	GALINDO_IMMUNE_RESPONSE_TO_ENTEROTOXIN	33	0.563858	3.38449	1.77735e-09	1.14386e-07	8.60439e-08	1492	tags=91%, list=37%, signal=58%	10628/1843/7316/5880/6352/4792/1051/960/2597/5292/4953/7128/9308/4502/3726/602/9709/6556/6892/10318/4616/65108/8807/5743/3553/5791/388/7127/5329/3678
JINESH_BLEBBISHIELD_TO_IMMUNE_CELL_FUSION_PBSHMS_UP	JINESH_BLEBBISHIELD_TO_IMMUNE_CELL_FUSION_PBSHMS_UP	JINESH_BLEBBISHIELD_TO_IMMUNE_CELL_FUSION_PBSHMS_UP	101	0.223221	1.95579	0.00616852	0.0397722	0.0299176	1762	tags=60%, list=44%, signal=35%	6281/6130/2149/3688/3312/57048/7791/89846/5879/9948/51316/3320/6867/91663/64393/64114/83641/678/389/1958/29801/1316/23406/84515/26999/3635/1265/1399/3725/51499/1729/50807/51706/10346/81/4616/3162/2534/23185/5902/2317/8216/64976/126205/10370/81037/340371/618/3382/2633/6876/23603/85378/23136/5516/11098/60675/64770/6249/7057/440503
PICCALUGA_ANGIOIMMUNOBLASTIC_LYMPHOMA_DN	PICCALUGA_ANGIOIMMUNOBLASTIC_LYMPHOMA_DN	PICCALUGA_ANGIOIMMUNOBLASTIC_LYMPHOMA_DN	60	0.432498	3.20156	1.57538e-08	8.06666e-07	6.06792e-07	1687	tags=82%, list=42%, signal=48%	7538/10209/3727/7763/5997/1831/3398/23645/5621/29080/29116/969/1654/7128/1316/5734/8073/2354/4170/3725/9262/64112/4705/8660/254170/8535/10140/25976/1195/4616/57018/23710/51735/4063/51119/57162/1105/11320/9314/6651/359948/9908/5252/10135/1326/221037/51320/51696/56255
REACTOME_MODULATION_BY_MTB_OF_HOST_IMMUNE_SYSTEM	REACTOME_MODULATION_BY_MTB_OF_HOST_IMMUNE_SYSTEM	REACTOME_MODULATION_BY_MTB_OF_HOST_IMMUNE_SYSTEM	3	0.988291	2.12631	2.2425e-06	7.21611e-05	5.42812e-05	50	tags=100%, list=1%, signal=99%	6233/7311/7316
REACTOME_INNATE_IMMUNE_SYSTEM	REACTOME_INNATE_IMMUNE_SYSTEM	REACTOME_INNATE_IMMUNE_SYSTEM	308	0.332149	3.86294	1e-10	8.45181e-09	6.35764e-09	1216	tags=55%, list=30%, signal=42%	3106/3689/6233/10628/2512/3043/3133/2219/6280/7311/5660/7316/387/1471/1072/1535/10487/5880/7305/1938/4069/10577/3903/4792/5473/8635/2353/10578/1727/391/2799/11025/960/51719/7454/2950/3312/23412/9535/1675/2268/3385/1235/1794/1650/7184/10875/3916/5869/3074/5687/7295/4067/5705/7879/5879/5094/84265/5547/8887/5718/51316/1385/3482/5690/7323/5515/4214/3320/1520/2665/3608/23593/2357/3837/26578/5175/1512/…
REACTOME_CYTOKINE_SIGNALING_IN_IMMUNE_SYSTEM	REACTOME_CYTOKINE_SIGNALING_IN_IMMUNE_SYSTEM	REACTOME_CYTOKINE_SIGNALING_IN_IMMUNE_SYSTEM	279	0.295379	3.36483	1e-10	8.45181e-09	6.35764e-09	1249	tags=53%, list=31%, signal=39%	3106/3122/3689/6233/3133/7311/3936/7316/1072/6352/4792/7431/3136/2353/3113/10581/1052/7534/1974/3606/960/3659/3688/8519/4478/3312/6175/81027/1982/1436/7184/2162/3669/84868/4904/3560/5687/4067/5705/3575/5034/1968/6888/6845/3394/5718/1385/5690/7323/10410/1445/5515/3320/3608/5770/6813/2357/3837/9978/84790/10673/3119/5292/81603/5293/9235/7132/5698/3433/3123/100101267/1958/3654/3597/5518/3586/3587/331…
REACTOME_ADAPTIVE_IMMUNE_SYSTEM	REACTOME_ADAPTIVE_IMMUNE_SYSTEM	REACTOME_ADAPTIVE_IMMUNE_SYSTEM	237	0.281738	3.09665	1.32032e-10	1.06461e-08	8.00821e-09	1700	tags=64%, list=42%, signal=39%	3106/3122/3689/6233/3133/6280/972/7311/7316/1535/7305/3903/4792/3113/7534/11025/3688/3820/8519/7454/10870/23608/3385/81027/974/915/5687/7529/4067/5705/7879/5879/353514/832/925/5718/10859/5690/7323/1445/9867/5515/1520/9978/84790/140739/1512/11026/27071/3119/29116/5293/1536/945/5698/7317/3123/29121/3695/5518/55905/8655/9040/140735/55819/3635/9341/8767/1508/2280/3111/912/6850/51465/811/916/821/7334/…

## Sheet: KEGG pathways
	ID	Description	setSize	enrichmentScore	NES	pvalue	p.adjust	qvalue	rank	leading_edge	core_enrichment
KEGG_MEDICUS_PATHOGEN_SARS_COV_2_NSP1_TO_TRANSLATION_INITIATION	KEGG_MEDICUS_PATHOGEN_SARS_COV_2_NSP1_TO_TRANSLATION_INITIATION	KEGG_MEDICUS_PATHOGEN_SARS_COV_2_NSP1_TO_TRANSLATION_INITIATION	11	0.907019	3.32702	1e-10	8.45e-09	6.36e-09	107	tags=91%, list=3%, signal=89%	6230/6224/6233/6229/6234/6194/6223/6204/2197/3921
KEGG_LEISHMANIA_INFECTION	KEGG_LEISHMANIA_INFECTION	KEGG_LEISHMANIA_INFECTION	28	0.564123	3.1355	8.1e-08	3.76e-06	2.83e-06	1206	tags=82%, list=30%, signal=58%	3122/3689/1535/4792/2353/3113/3688/3119/3123/3654/3586/3725/3111/3716/4615/3115/65108/5595/2212/5743/4689/3127/3553
KEGG_OXIDATIVE_PHOSPHORYLATION	KEGG_OXIDATIVE_PHOSPHORYLATION	KEGG_OXIDATIVE_PHOSPHORYLATION	31	0.477534	2.76632	5.42e-06	0.00014962	0.000112548	566	tags=55%, list=14%, signal=47%	1350/4695/9167/10063/1347/4722/4697/9377/4708/4696/374291/4702/4706/4712/4729/1537/1337
KEGG_PARKINSONS_DISEASE	KEGG_PARKINSONS_DISEASE	KEGG_PARKINSONS_DISEASE	40	0.412916	2.68767	3.02e-05	0.000647366	0.000486963	740	tags=52%, list=18%, signal=43%	1350/4695/9167/1347/4722/4697/9377/4708/7419/4696/374291/4702/4706/4712/7317/4729/1537/7416/1337/51465/4705
KEGG_LYSOSOME	KEGG_LYSOSOME	KEGG_LYSOSOME	35	0.424729	2.61175	5.07e-05	0.000995209	0.000748619	1568	tags=77%, list=39%, signal=47%	5660/10577/2799/7805/5538/3916/3074/26088/1200/3482/1520/1512/3988/1508/6556/4125/1521/4864/3920/285362/1509/1777/6272/9741/2581/3425/57192
KEGG_ALZHEIMERS_DISEASE	KEGG_ALZHEIMERS_DISEASE	KEGG_ALZHEIMERS_DISEASE	51	0.365273	2.55055	6.72e-05	0.00122674	0.000922778	1007	tags=55%, list=25%, signal=42%	1350/4695/9167/805/1347/4722/2597/4697/9377/4708/4696/374291/4702/4706/4712/7132/8883/4729/1537/1337/2932/823/4705/3710/5330/5534/5595/4715
KEGG_VIRAL_MYOCARDITIS	KEGG_VIRAL_MYOCARDITIS	KEGG_VIRAL_MYOCARDITIS	25	0.470541	2.49421	8.58e-05	0.00149031	0.00112104	2012	tags=96%, list=50%, signal=48%	3106/3122/3689/3133/5880/3113/1982/5879/5551/3119/3123/3111/3115/942/2534/3135/3127/1981/1604/940/958/959/836/595

## Sheet: various signaling pathways
	ID	Description	setSize	enrichmentScore	NES	pvalue	p.adjust	qvalue	rank	leading_edge	core_enrichment
KEGG_NEUROTROPHIN_SIGNALING_PATHWAY	KEGG_NEUROTROPHIN_SIGNALING_PATHWAY	KEGG_NEUROTROPHIN_SIGNALING_PATHWAY	41	0.374032	2.45253	0.000175569	0.00264863	0.00199236	1466	tags=68%, list=36%, signal=44%	387/4792/7534/805/7529/5879/1445/4214/5293/3654/1399/8767/3725/2932/8660/9261/8986/11108/2885/5595/5605/998/11213/4217/3656/6272/5894/2309
REACTOME_ALPHA_PROTEIN_KINASE_1_SIGNALING_PATHWAY	REACTOME_ALPHA_PROTEIN_KINASE_1_SIGNALING_PATHWAY	REACTOME_ALPHA_PROTEIN_KINASE_1_SIGNALING_PATHWAY	3	0.988291	2.12631	2.2425e-06	7.21611e-05	5.42812e-05	50	tags=100%, list=1%, signal=99%	6233/7311/7316
WP_B_CELL_RECEPTOR_SIGNALING_PATHWAY	WP_B_CELL_RECEPTOR_SIGNALING_PATHWAY	WP_B_CELL_RECEPTOR_SIGNALING_PATHWAY	32	0.414385	2.44669	0.000119363	0.00194729	0.00146479	1514	tags=75%, list=38%, signal=47%	5880/4792/3059/2113/974/4067/5879/1385/27071/3635/1399/3725/6850/2932/2534/2885/4690/973/5605/8462/998/23396/5894/118788
WP_IL_3_SIGNALING_PATHWAY	WP_IL_3_SIGNALING_PATHWAY	WP_IL_3_SIGNALING_PATHWAY	20	0.533245	2.53943	2.38968e-05	0.000537294	0.000404165	1000	tags=75%, list=25%, signal=57%	2353/7529/4067/969/5293/3055/3635/1399/3725/6850/3716/942/2534/2885/5595
WP_NETWORK_MAP_OF_SARS_COV_2_SIGNALING_PATHWAY	WP_NETWORK_MAP_OF_SARS_COV_2_SIGNALING_PATHWAY	WP_NETWORK_MAP_OF_SARS_COV_2_SIGNALING_PATHWAY	76	0.365748	2.94254	3.79487e-07	1.5212e-05	1.14428e-05	1249	tags=61%, list=31%, signal=43%	3122/6194/1843/3043/6352/1051/2353/1974/3606/8519/3312/1235/5879/925/196/914/10410/54541/3123/1958/3654/3586/708/10379/1508/3725/3726/3543/916/6009/81631/3716/917/4615/8554/2534/114548/8807/1509/5743/58191/3127/920/5199/3553/29110
WP_T_CELL_ACTIVATION_SARS_COV_2	WP_T_CELL_ACTIVATION_SARS_COV_2	WP_T_CELL_ACTIVATION_SARS_COV_2	35	0.357075	2.19573	0.00140203	0.0132372	0.00995733	1184	tags=60%, list=29%, signal=43%	3122/4792/2353/915/5293/3123/3725/2932/916/6009/4049/29851/917/4615/942/2534/5728/2885/5595/5605/920
WP_TNF_ALPHA_SIGNALING_PATHWAY	WP_TNF_ALPHA_SIGNALING_PATHWAY	WP_TNF_ALPHA_SIGNALING_PATHWAY	30	0.450488	2.57912	7.73931e-05	0.00137647	0.00103541	1547	tags=80%, list=39%, signal=50%	1535/4792/7295/5879/5871/5515/4214/3320/7132/7128/3725/5790/5836/8439/5708/8837/2885/5595/4217/29110/10131/8737/5894/1326
